# Supplementary material for: Challenges with social distancing during the COVID-19 pandemic among Hispanics in New York City: a qualitative study
Source: Springer Nature journal article supplement (doi:10.1186/s12889-021-11939-7), 2021-10-26
Supplement: MOESM2 [file 19796280]

## Additional File 2. Code Book

| Codes                                                             | Description                                                                                                                              |
|-------------------------------------------------------------------|------------------------------------------------------------------------------------------------------------------------------------------|
| Frequent reminders to socially distance                           | Participant received frequent cues and instructions to socially distance                                                                 |
| Fear of COVID-19                                                  | Participant expresses fear of contracting or having COVID-19                                                                             |
| Known contact                                                     | Participant knew someone who had contracted COVID-19                                                                                     |
| Known contact: Death                                              | Death of a family member or friend from COVID-19                                                                                         |
| COVID-19 test result                                              | Participants refers to known test results related to COVID-19                                                                            |
| Housing                                                           | This category refers to codes related to characteristics of the participant's home that relate to COVID-19 risks                         |
| Housing: Multi-bedroom                                            | Living in a household with more than one bedroom                                                                                         |
| Housing: Multi-generational                                       | Living in a household with more than one generation (i.e. parent-child, grandparent-child, grandparent-parent)                           |
| Housing: Multi-person                                             | Living in a household with at least one other person                                                                                     |
| Family in medicine                                                | Participant has a family member who works in healthcare                                                                                  |
| High perceived risk                                               | Participant feels they are at high risk of contracting COVID-19                                                                          |
| Low perceived risk                                                | Participant feels they are at low risk or not at risk of contracting COVID-19                                                            |
| Lack of confidence in taking preventative measures                | Participant is not confident in their ability to socially distance, quarantine, or practice other COVID-19-related preventative measures |
| Confidence in taking preventative measures                        | Participant is confident in their ability to socially distance, quarantine, or practice other COVID-19-related preventative measures     |
| Precautions to mitigate risks                                     | This category refers to codes related to COVID-19 precautions                                                                            |
| Precautions: Keep distance                                        | Staying physically distanced from others                                                                                                 |
| Precautions: Avoid crowds                                         | Avoiding crowds or crowded spaces                                                                                                        |
| Precautions: Avoid people with symptoms                           | Avoiding people with symptoms                                                                                                            |
| Precautions: Avoid interactions with people from outside the home | Avoiding specific interactions with another person/people outside the home                                                               |
| Precautions: Stay indoors                                         | Attempting to stay indoors                                                                                                               |
| Precautions: Hand hygiene                                         | Hand washing or not touching other things                                                                                                |

|                                                         |                                                                                                                                               |
|---------------------------------------------------------|-----------------------------------------------------------------------------------------------------------------------------------------------|
| Precautions: Sanitizing surfaces                        | Sanitizing a surface (i.e. wiping, lysoling, cleaning)                                                                                        |
| Precautions: Use of personal protective equipment (PPE) | Specific PPE use (masks, gloves, goggles)                                                                                                     |
| Precautions: Self-monitoring                            | Self-monitoring of potential COVID-19 signs and/or symptoms                                                                                   |
| Precautions: Self-quarantine                            | Participant refers to self-quarantining                                                                                                       |
| Precautions: Working remotely                           | Working remotely                                                                                                                              |
| Information transfer                                    | This category refers to codes related to the participant receiving or giving information related to COVID-19, its risks and related behaviors |
| Information transfer: Family member                     | With a family member                                                                                                                          |
| Information transfer: Friends                           | With a friend                                                                                                                                 |
| Information transfer: Government agency                 | Through a government agency                                                                                                                   |
| Information transfer: TV/news                           | Through television or televised news, including government press conferences                                                                  |
| Information transfer: Health provider                   | With a health provider                                                                                                                        |
| Information transfer: Work                              | Through work or their occupation                                                                                                              |
| Information transfer: Internet                          | Through internet searches                                                                                                                     |
| Avoid others at home                                    | Participant avoided someone they live with as an exceptional precaution                                                                       |
| Disaster preparation                                    | Participant bought extra supplies or strategized for a worst case scenario                                                                    |
| Quarantining elsewhere                                  | Participant refers to having to leave one's home in order to successfully isolate, quarantine or distance from others                         |
| Avoid public transportation                             | Participant refers to the risks associated with public transportation                                                                         |
| Drinking fluids                                         | Participant notes the benefits of fluid intake for mitigating the risks COVID-19                                                              |
| Supporting others                                       | Participant cares for or supports someone else, emotionally, or functionally                                                                  |
| Ability to isolate at home                              | Participant is capable of isolating at home                                                                                                   |
| Inability to isolate at home                            | Participant is not able to successfully isolate at home                                                                                       |
| Public housing                                          | Participant refers to living in publicly-assisted housing                                                                                     |

|                                                                       |                                                                                                                                                |
|-----------------------------------------------------------------------|------------------------------------------------------------------------------------------------------------------------------------------------|
| Others are unhygienic or careless                                     | Participant expresses feelings, opinions, or observations that others are unhygienic (i.e. spitting, dirty, do not practice hand washing)      |
| Healthcare worker                                                     | Participant works in a healthcare setting or provides healthcare                                                                               |
| Hospital exposure                                                     | Participant was in a setting that provides healthcare                                                                                          |
| Essential worker                                                      | Participant is a healthcare worker                                                                                                             |
| Accessing goods and services: Supermarkets                            | Refers specifically to supermarket, grocery store or required shopping                                                                         |
| Accessing goods and services                                          | Participant refers to challenges accessing a good or service, such as food, delivery, or medications                                           |
| Home schooling                                                        | Participants refers to having to home school children                                                                                          |
| Unreliable information                                                | This category related to transferring inaccurate or unreliable information related to COVID-19                                                 |
| Unreliable information: Poor communication from doctors               | Unfavorable communication or interactions with doctors                                                                                         |
| Unreliable information: Misinformation                                | Perception that information is not accurate                                                                                                    |
| Unreliable information: Lack of information                           | Not enough information regarding COVID-19, preventative measures, management, or treatment                                                     |
| Psychological toll                                                    | Codes in this category relate to impacts on mental health                                                                                      |
| Psychological toll: Distress from uncertainty                         | Distress from uncertainty or not knowing what's happening                                                                                      |
| Psychological toll: Mental health challenges due to social distancing | Mental health challenges due to social distancing, including anxiety and depression                                                            |
| Lives alone                                                           | Participant lives alone                                                                                                                        |
| Retired                                                               | Participant is retired                                                                                                                         |
| Financial strain                                                      | Participant refers to experiencing significant financial stress (not having enough money, not being able to pay for rent, buy groceries, etc.) |
| Financial strain: Not working due to COVID-19                         | Related to being furloughed or unemployed due to COVID-19                                                                                      |
| COVID-19 symptoms                                                     | Participant refers to symptoms of COVID-19                                                                                                     |
| Physical impact of staying indoors                                    | Participant refers to the consequences of social distancing on personal physical health                                                        |
| Okay to go outside                                                    | Participant feeling that going or being outside (of their home) is permissible                                                                 |
| Socializing                                                           | Participant refers to socializing with friends and family during the pandemic                                                                  |

|                             |                                                                                                                                                                                                                                  |
|-----------------------------|----------------------------------------------------------------------------------------------------------------------------------------------------------------------------------------------------------------------------------|
| Coping and self-care        | Strategies for coping with any psychological distress and self-care despite the circumstances                                                                                                                                    |
| Reopening                   | Participant refers to the ending of stay of home orders                                                                                                                                                                          |
| Awaiting vaccine            | Participant refers to the anticipated development of the vaccine                                                                                                                                                                 |
| Belief in fate and destiny  | Participant expresses that future outcomes are destined to occur and outside the hands of the participant, such as "what's meant to happen, is going to happen", "I can't control what's bound to happen," "It's in God's hands" |
| Belief in cure or treatment | Participant believes in a cure or treatment for COVID-19                                                                                                                                                                         |
